# Supplementary material for: A solid solution-based millimeter-wave absorber exhibiting highly efficient absorbing capability and ultrabroad bandwidth simultaneously via a multi-elemental co-doping strategy
Source: Royal Society of Chemistry journal article supplement (doi:10.1039/d1tc05078h), 2021-12-08

## Supporting Information

Figure S1. EDS analysis on the selected regions of the sample sintered at 1200 °C

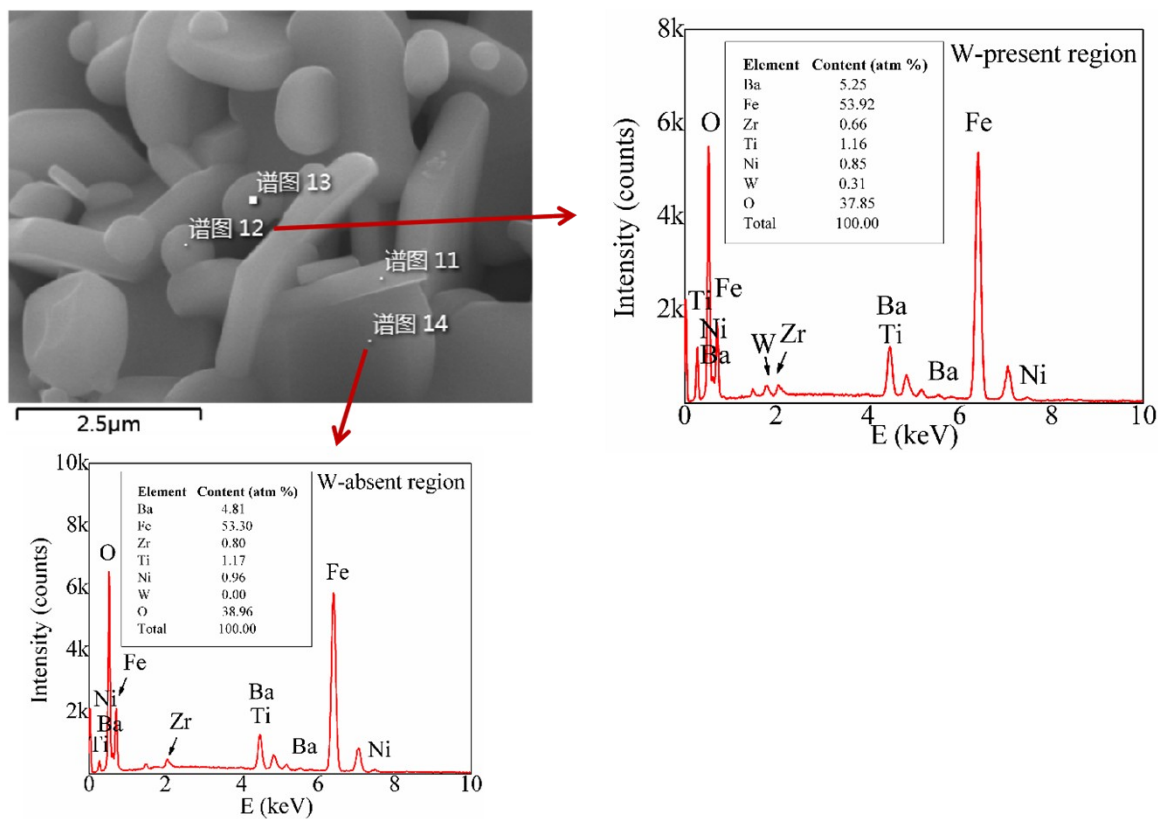

Figure S2. EDS analysis on the selected regions of the sample sintered at 1300 °C

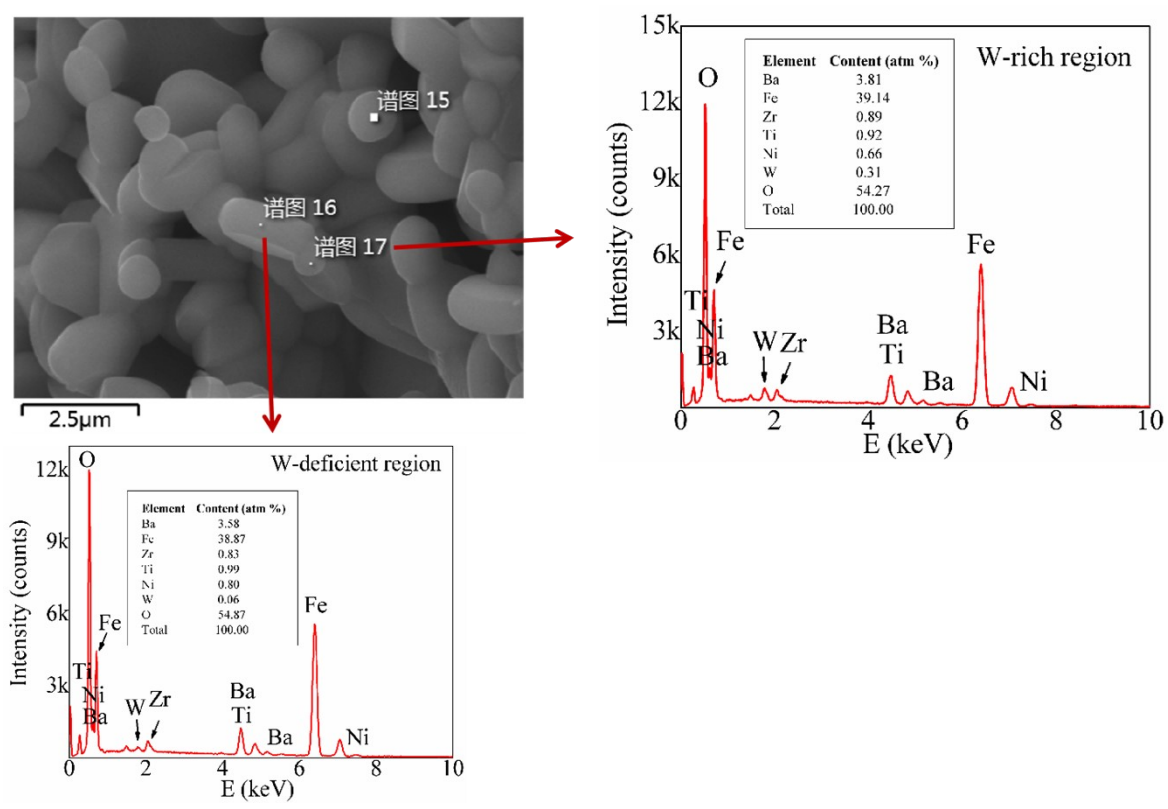

Figure S3. EDS analysis of the sample sintered at 1400 °C

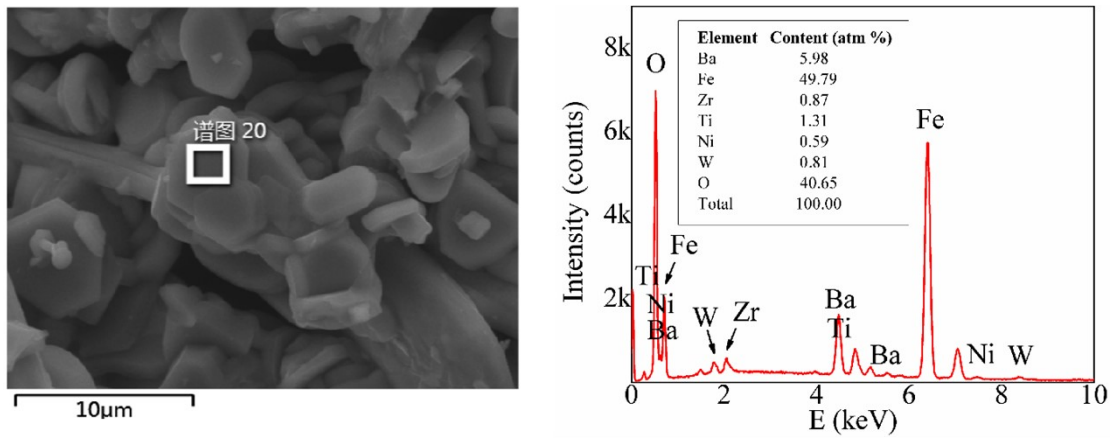

Table S1. Lattice constants of the samples sintered at 1200 °C, 1300 °C and 1400 °C, respectively. Note that the pristine values are  $a=b=5.892 \text{ \AA}$ ,  $c=23.198 \text{ \AA}$ ,  $c/a=3.937$ ,  $\text{Volume}=697.4 \text{ \AA}^3$ .

| Sample | <b>a [Å]</b> | <b>c [Å]</b> | <b>c/a</b> | <b>Volume [Å<sup>3</sup>]</b> |
|--------|--------------|--------------|------------|-------------------------------|
| 1200   | 5.871        | 23.194       | 3.951      | 692.3                         |
| 1300   | 5.888        | 23.237       | 3.946      | 697.6                         |
| 1400   | 5.888        | 23.237       | 3.946      | 697.6                         |

Figure S4. The imaginary part of complex permeability as a function of frequency in K and R bands for the sample sintered at 1200 °C. An almost symmetric loss peak was observed.

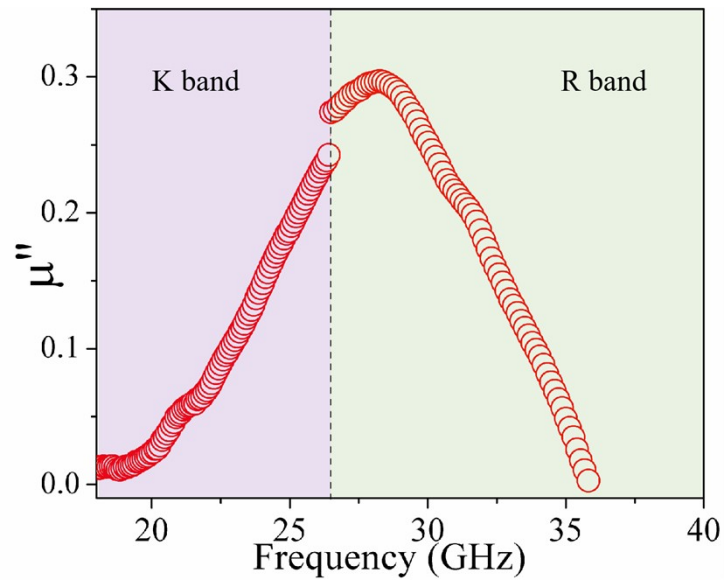

Figure S5. Reflection loss as a function of frequency at different thicknesses in K band for the samples sintered at 1200 °C and 1300 °C, respectively.

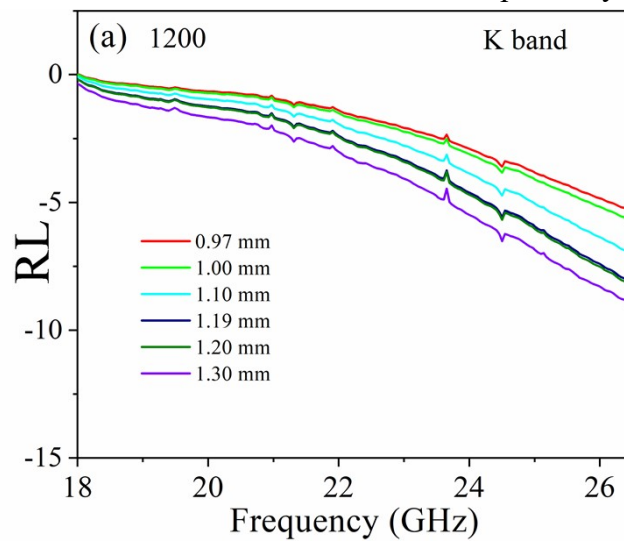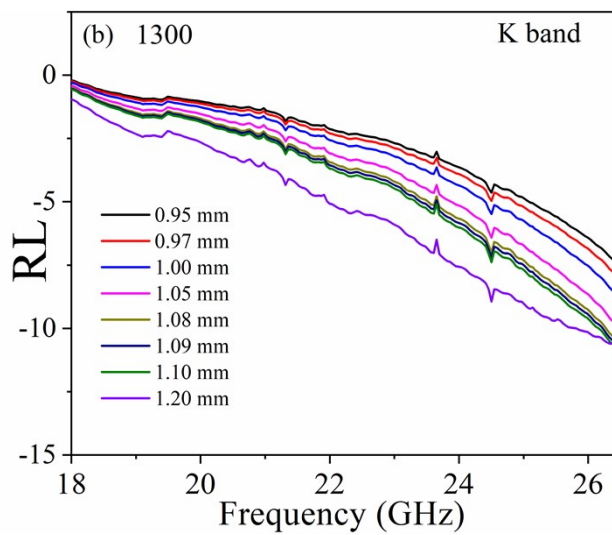

Table S2. Experimental, theoretical and numerical fitting parameters of the multi-elemental co-doped BFO absorbers in the investigated frequency range (18-40 GHz)

| Sample | $M_s$<br>(emu/g) | $H_a$<br>(kOe) | $K_1$<br>( $\times 10^5$<br>erg/cm <sup>3</sup> ) | $\chi_p$<br>( $\times 10^{-4}$ ) | $H_c$<br>(kOe) | g-factor | $f_r$<br>(GHz) | $RL_{\min}$<br>(dB) | $f_{\min}$<br>(GHz) | -10 dB<br>Bandwidth<br>(GHz) | -20 dB<br>Bandwidth<br>(GHz) | $t_m$<br>(mm) | $\sigma$<br>(S/cm)    |
|--------|------------------|----------------|---------------------------------------------------|----------------------------------|----------------|----------|----------------|---------------------|---------------------|------------------------------|------------------------------|---------------|-----------------------|
| 1200   | 45.33            | 8.167          | 1.851                                             | 3.912                            | 1.416          | 2.465    | 28.18          | -15.6               | 29.88               | 7.67                         | 0                            | 1.19          | $3.51 \times 10^{-5}$ |
|        |                  |                |                                                   |                                  |                | 2.310    | 26.5           |                     |                     |                              |                              |               |                       |
| 1300   | 46.62            | 8.194          | 1.910                                             | 4.493                            | 0.916          | 2.528    | 29.0           | -32.6               | 29.13               | 10.61                        | 5.23                         | 1.09          | $1.80 \times 10^{-5}$ |
|        |                  |                |                                                   |                                  |                | 2.955    | 33.9           |                     |                     |                              |                              |               |                       |
|        |                  |                |                                                   |                                  |                | 2.246    | 25.6           |                     |                     |                              |                              |               |                       |
| 1400   | 49.10            | 8.142          | 1.999                                             | 4.338                            | 0.245          | 2.290    | 26.1           | -61.8               | 33.58               | 13.60                        | 9.15                         | 0.97          | $1.17 \times 10^{-4}$ |
|        |                  |                |                                                   |                                  |                | 2.737    | 31.2           |                     |                     |                              |                              |               |                       |

Figure S6. Comparison of the core performance parameters (RL, bandwidth and matching thickness) of the multi-elemental co-doped BFO absorber with recently developed millimeter-wave absorbers and representative commercial products using (a)  $-10$  dB, (b)  $-25$  dB and (c)  $-20$  dB as the criterion for the determination of effective bandwidth. Note that commercial products disappear in Fig. S6b as their  $-25$  dB bandwidth diminishes to zero.

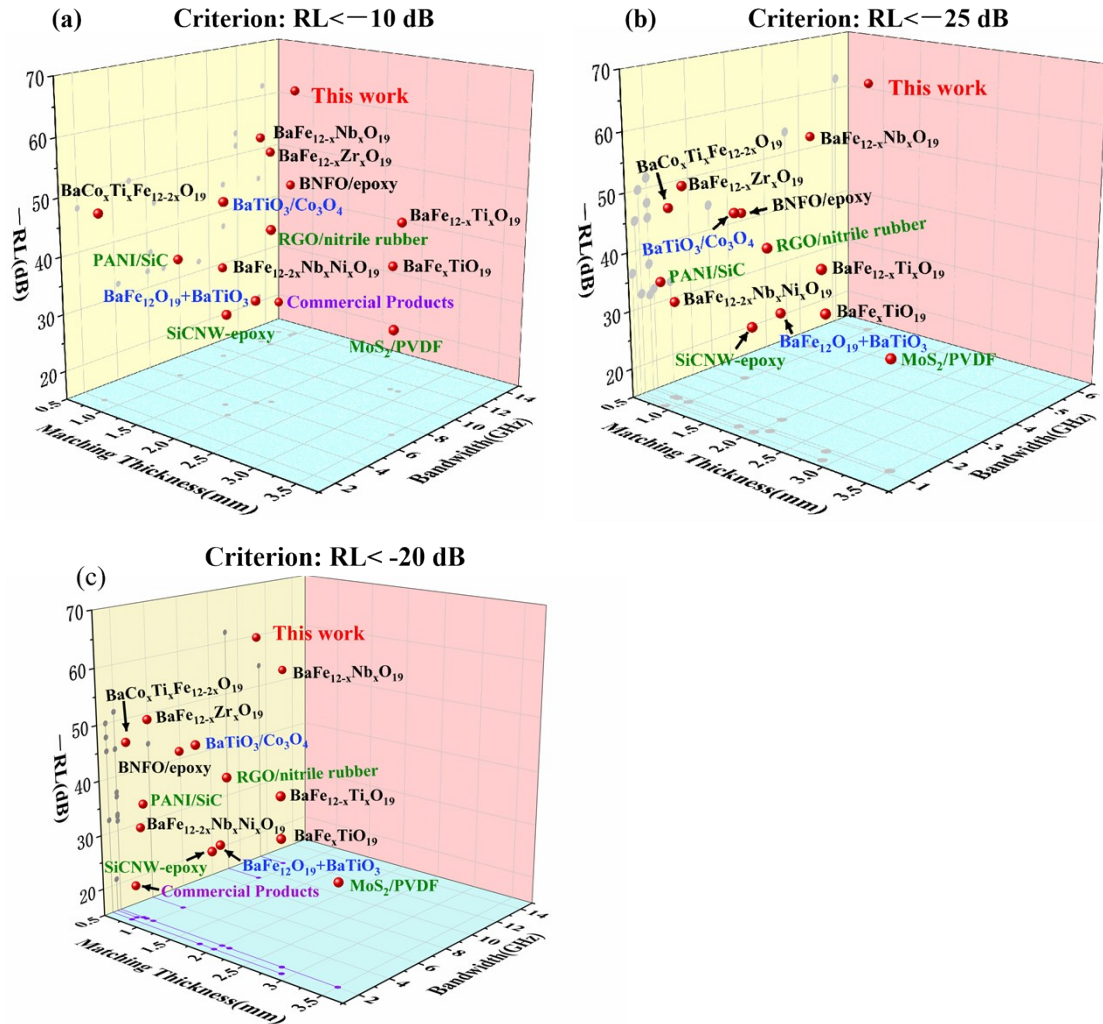

Supplement: d1tc05078h1.pdf [file d1tc05078h1.pdf]
